# Supplementary material for: Preparation of different morphology Cu/GO nanocomposites and their catalytic performance for thermal decomposition of ammonium perchlorate
Source: Royal Society of Chemistry journal article supplement (doi:10.1039/d2ra03772f), 2022-01-01
Supplement: d2ra03772f1.pdf [file d2ra03772f1.pdf]

## SUPPORTING INFORMATION

### Preparation of Different Morphology Cu/GO nanocomposites and Their Catalytic Performance for Thermal Decomposition of Ammonium Perchlorate

Shengnan Li<sup>1</sup>, Ziteng Niu<sup>1</sup>, Yuke Jiao<sup>1</sup>, Peng Jin<sup>1</sup>, Desheng Yang<sup>1</sup>, Chaoferi Bai<sup>1</sup>, Jiaran Liu<sup>1</sup>,  
Guoping Li<sup>\*1,2</sup>, Yunjun Luo<sup>1,2</sup>

1 School of Materials Science and Engineering, Beijing Institute of Technology, Beijing, 100081, China

2 Key Laboratory for Ministry of Education of High Energy Density Materials, Beijing Institute of Technology, Beijing, 100081, China

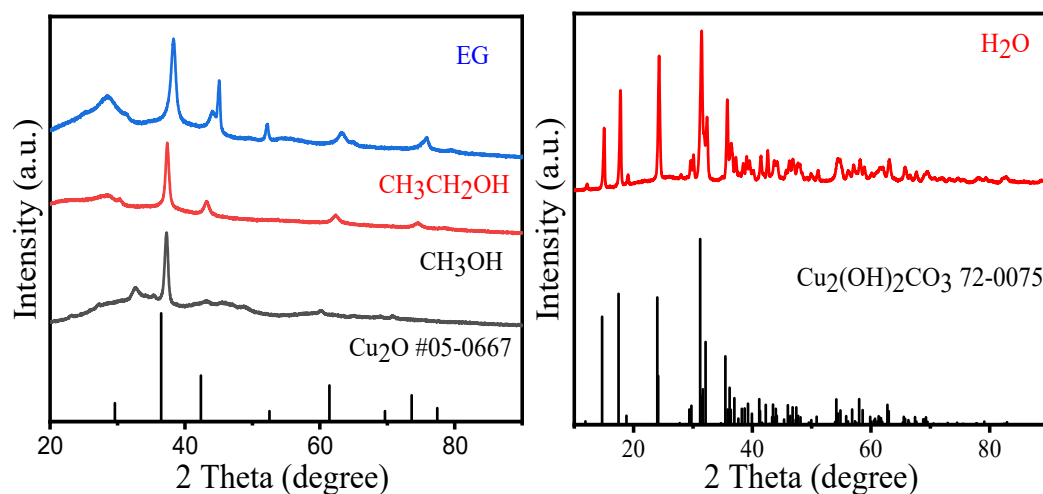

Fig. S1. XRD diffraction images of initial products

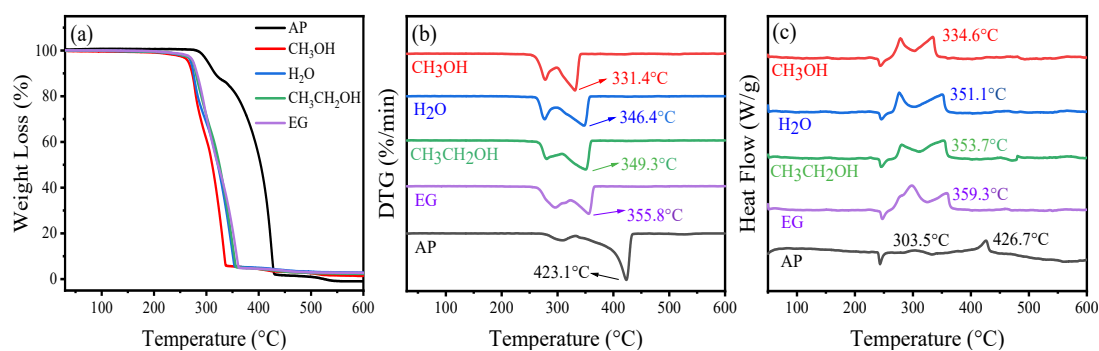

Fig. S2. TG (a) curves, DTG (b) curves and DSC (c) curves of Cu/GO nanocomposites that placed a month

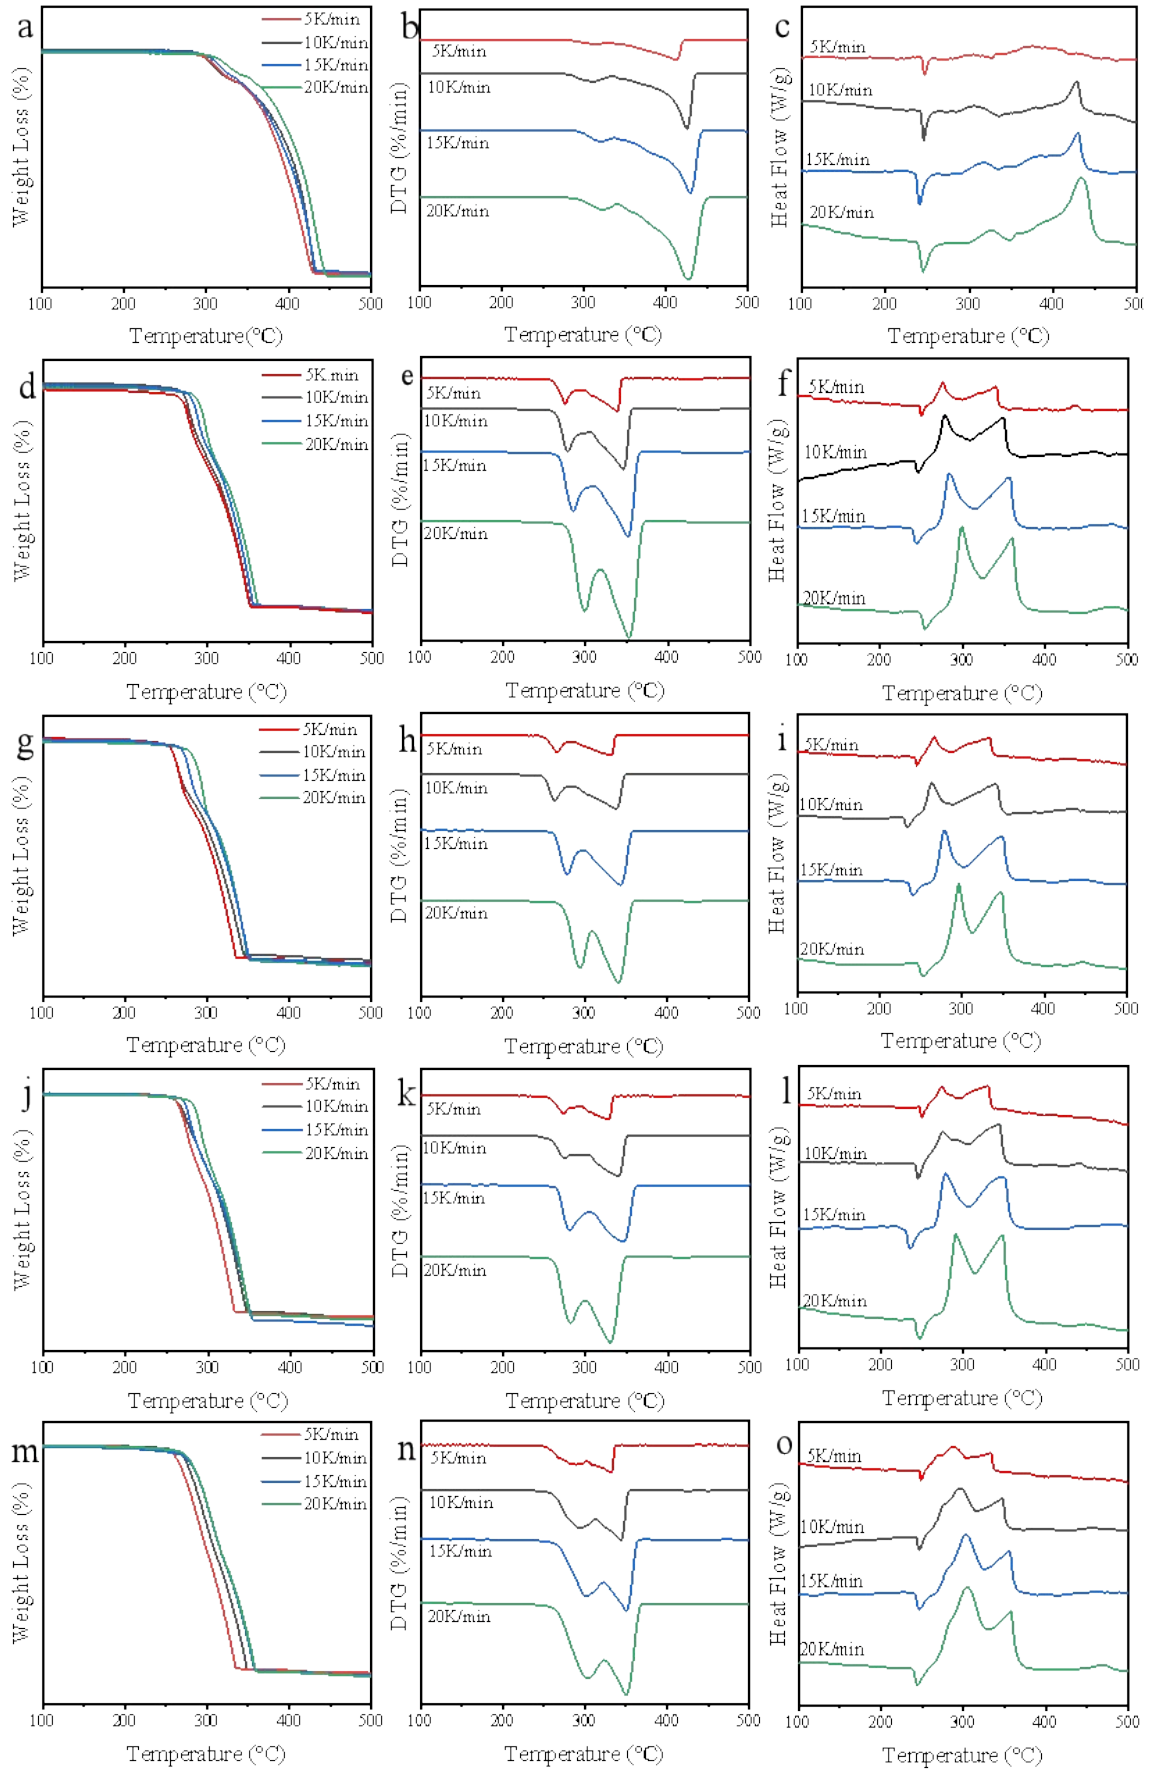

**Fig.S3.** TG, DTG and DSC curves of AP(a,b,c), bubble-like Cu/GO -AP mixtures(d,e,f), flower-like Cu/GO -AP mixtures(g,h,i), columnar Cu/GO -AP mixtures(j,k,l), teardrop-shaped Cu/GO -AP mixtures(m,n,o).
